# Supplementary material for: A GntR Family Transcription Factor in Streptococcus mutans Regulates Biofilm Formation and Expression of Multiple Sugar Transporter Genes
Source: Front Microbiol. 2019 Jan 14;9:3224. doi: 10.3389/fmicb.2018.03224 (PMC6340165; doi:10.3389/fmicb.2018.03224)
Supplement: TABLE S1 — Bacterial strains, plasmids, and primers used in this study. [file Table_1.XLSX]

## Sheet: Sheet1
Table S1. Bacterial strains, plasmids, and primers used in this study
Strain or plasmid	Description	Source
S. mutans
UA159	Wild type strain	ATCC 700610
ΔstsR	UA159 ΔstsR; Ems; p-Cl-Pher	This study
ΔstsR/pDL278-stsR	UA159 ΔstsR/pDL278-stsR; Ems; p-Cl-Pher; Sper	This study
E. coli
DH5α	F- φ80dlacZΔM15 Δ(lacZYA-argF)U169 deoR recA1 endA1 hsdR17(rk-，mk+) phoA supE44 λ- thi-1 gyrA96 relA1	Laboratory stock
BL21(DE3)	F- ompT hsdS B(rB-mB-)dcm gal (DE3)	Novagen
Plasmids
pET28a	Kanr expression vector with 6His-tag coding sequence	Novagen
pETstsR	pET derivative for expression 6His-StsR	This study
pDL278	E. coli-Streptococcus shuttle vector (Sper)	LeBlanc et al., 1992
pDL278-stsR	pDL278 derivative for complementation of stsR in S. mutans ΔstsR	This study
Primers	Sequence (5’ to 3’)	Used in
SMU.640cupF	CAGTTGCTTCAAACTAGCGTG	In-frame deletion construction
SMU.640cupR	GAGTGTTATTGTTGCTCGG AGGCATGTCTTTCTCCTT	In-frame deletion construction
SMU.640cdnF	GGTATACTACTGACAGCTTC CTCAAGTCATCACTAAGA	In-frame deletion construction
SMU.640cdnR	ACCATGTGGACAAGACCT	In-frame deletion construction
SMU.640ccheckF	CTCCAGTAATTGTCCTTGCCT	In-frame deletion construction
SMU.640ccheckR	GGGTTGGTTCTTATCACC	In-frame deletion construction
SMU.640cupdnR	TCTTAGTGATGACTTGAGAGGCATGTCTTTCTCCTT	In-frame deletion construction
SMU.953cupF	CTCCTCTAATAATAATTG	In-frame deletion construction
SMU.953cupR	GAGTGTTATTGTTGCTCGG AACCATTTTGTCCCCATACAG	In-frame deletion construction
SMU.953cdnF	GGTATACTACTGACAGCTTC AAATACAGACTAGAACAACCA	In-frame deletion construction
SMU.953cdnR	TCCAAGTATCATTCAAACGAT	In-frame deletion construction
SMU.953ccheckF	TCAAGGCTGCAAATAAACTCA	In-frame deletion construction
SMU.953ccheckR	GGCAAACTATGGTCGGCC	In-frame deletion construction
SMU.953cupdnR	TTCTAGTCTGTATTTTTACTCAACCATTTTGTCCCCATACAG	In-frame deletion construction
SMU.1012cupF	GGTGTTACTGAATTATCTGAC	In-frame deletion construction
SMU.1012cupR	GAGTGTTATTGTTGCTCGG CATGGTTAACTCCTAGTT	In-frame deletion construction
SMU.1012cdnF	GGTATACTACTGACAGCTTC TGACCAATGCAGACTAAAG	In-frame deletion construction
SMU.1012cdnR	ACCATAACCTCAATTCAT	In-frame deletion construction
SMU.1012ccheckF	GTTATCTTCTTCGTCGCT	In-frame deletion construction
SMU.1012ccheckR	GGCAGGATCTCAGAACTC	In-frame deletion construction
SMU.1012cupdnR	CTTTAGTCTGCATTGGTCCATGGTTAACTCCTAGTT	In-frame deletion construction
SMU.1064cupF	CTGACTGCCGTAGTCAAG	In-frame deletion construction
SMU.1064cupR	GAGTGTTATTGTTGCTCGG TGTTTCCATTACTTACTT	In-frame deletion construction
SMU.1064cdnF	GGTATACTACTGACAGCTTC AATACTAACTTAATACGA	In-frame deletion construction
SMU.1064cdnR	TCGTTTAAATCGTGGGTGATG	In-frame deletion construction
SMU.1064ccheckF	TTCACGAATGCGGCGTGCGAT	In-frame deletion construction
SMU.1064ccheckR	CATAAGAGCGATACGATCACC	In-frame deletion construction
SMU.1064cupdnR	TCGTATTAAGTTAGTATTTCATGTTTCCATTACTTACTT	In-frame deletion construction
SMU.1065cupF	GGTTAATTGGTCACCTATAGC	In-frame deletion construction
SMU.1065cupR	GAGTGTTATTGTTGCTCGG CGTCTCTCCTTAACCACA	In-frame deletion construction
SMU.1065cdnF	GGTATACTACTGACAGCTTC AAGTAAGTAATGGAAACA	In-frame deletion construction
SMU.1065cdnR	TATTCAACTTTATTCCTC	In-frame deletion construction
SMU.1065ccheckF	CGCCTTCACCCTTACGAAGAAG	In-frame deletion construction
SMU.1065ccheckR	AATCATCTCAAGTGCTGC	In-frame deletion construction
SMU.1065cupdnR	TGTTTCCATTACTTACTTCGTCTCTCCTTAACCACA	In-frame deletion construction
SMU.1193upF	TTGATAGTCATCACTCAA	In-frame deletion construction
SMU.1193upR	GAGTGTTATTGTTGCTCGG AAGCCATTTTTTCTCCTTTCTAAAG	In-frame deletion construction
SMU.1193dnF	GGTATACTACTGACAGCTTC TGACAGAACAACTGCCCT	In-frame deletion construction
SMU.1193dnR	CTAGAATTCCTTGTGATCTTG	In-frame deletion construction
SMU.1193checkF	CCATTTGATGAATGACAGCCA	In-frame deletion construction
SMU.1193checkR	AATTAGCAGTGTTGCGAT	In-frame deletion construction
SMU.1193updnR	AGGGCAGTTGTTCTGTCA AAGCCATTTTTTCTCCTTTCTAAAG	In-frame deletion construction
SMU.2040upF	CATGGAAACCACTTCTGG	In-frame deletion construction
SMU.2040upR	GAGTGTTATTGTTGCTCGG AAGCAATTCAATCTAATTTGT	In-frame deletion construction
SMU.2040dnF	GGTATACTACTGACAGCTTC GACAACAAGGAAAGCACA	In-frame deletion construction
SMU.2040dnR	GGGAATTACATCCGACTG	In-frame deletion construction
SMU.2040checkF	GCTGGGATAAGAGATAAA	In-frame deletion construction
SMU.2040checkR	CAGAACGATTCAATTGCT	In-frame deletion construction
SMU.2040updnR	TGTGCTTTCCTTGTTGTCAAGCAATTCAATCTAATTTGT	In-frame deletion construction
SMU.1975checkF	CTATGATCATTAAAAAGATAT	In-frame deletion construction
SMU.1975checkR	ATGGATGATTTCTTACAGGCTC	In-frame deletion construction
SMU.1975upF	AGTCAAGAATATTTCAGTAC	In-frame deletion construction
SMU.1975upR	GAGTGTTATTGTTGCTCGG ATTTCTCCTTTTTTCTTTATATAA	In-frame deletion construction
SMU.1975dnF	GGTATACTACTGACAGCTTC AATGACAAAAAACTAGGAATGAAC	In-frame deletion construction
SMU.1975dnR	AACTTAATCGCTCTACAGTTG	In-frame deletion construction
SMU.1975updnR	GTTCATTCCTAGTTTTTTGTCATT ATTTCTCCTTTTTTCTTTATATAA	In-frame deletion construction
SMU.1977upF	ATAATGAGTCAGGTTTGCTGG	In-frame deletion construction
SMU.1977upR	GAGTGTTATTGTTGCTCGG CATTGTCCTCCAAGAAAGTT	In-frame deletion construction
SMU.1977dnF	GGTATACTACTGACAGCTTC GGAAGAATATAAAAAATCACAGCA	In-frame deletion construction
SMU.1977dnR	AAGCTCCAAGTCCAAAACCA	In-frame deletion construction
SMU.1977checkF	GAAGATTTTAAAACACCAGA	In-frame deletion construction
SMU.1977checkR	ACAAAACTACCAATATCACTTG	In-frame deletion construction
SMU.1977updnR	TGCTGTGATTTTTTATATTCTTCC CATTGTCCTCCAAGAAAGTT	In-frame deletion construction
ldhF	CCGAGCAACAATAACACTC	In-frame deletion construction
ermR	GAAGCTGTCAGTAGTATACC	In-frame deletion construction
SMU.1193compF	TTGTTGTCGACCTCCGTAGAGATTATCTCCATC	Complementary expression
SMU.1193compR	TTGTTGAGCTCGTAATAAGGGCAGTTGTTCTG	Complementary expression
SMU.1193cf	GGGTCCATGGCTTGGAAATTTAATGAGAA	ORF cloning
SMU.1193cr	TGTGCTCGAGTTTCGTCTCTCCTTTAATAT	ORF cloning
SMU.1193promoterF	CTCCGTAGAGATTATCTCCAT	EMSA
SMU.1193promoterR	AGCCATTTTTTCTCCTTTCTA	EMSA
SMU.1193promoter1F	CTCCGTAGAGATTATCTCCAT	EMSA
SMU.1193promoter1R	TGTTTGCACAATTAGATACTA	EMSA
SMU.1193promoter2F	CTTCTGTCTCCTTAAGATCTA	EMSA
SMU.1193promoter2R	AGCCATTTTTTCTCCTTTCTA	EMSA
16S RNAF	AGCGTTGTCCGGATTTATTG	qRT-PCR
16S RNAR	CTACGCATTTCACCGCTACA	qRT-PCR
gtfBF	CACTATCGGCGGTTACGAAT	qRT-PCR
gtfBR	CAATTTGGAGCAAGTCAGCA	qRT-PCR
gtfCF	GATGCTGCAAACTTCGAACA	qRT-PCR
gtfCR	TATTGACGCTGCGTTTCTTG	qRT-PCR
gtfDF	TTGACGGTGTTCGTGTTGAT	qRT-PCR
gtfDR	AAAGCGATAGGCGCAGTTTA	qRT-PCR
ldhF	TTGGTGATGGTGCTGTAGGTTC	qRT-PCR
ldhR	AGCATCCGCACAGTCTTCATA	qRT-PCR
ftfF	AAAATATGAAGGCGGCTACAACG	qRT-PCR
ftfR	CTTCACCAGTCTTAGCATCCTGAA	qRT-PCR
Smu.876F	CGGTTCAAAAGCCGAAAATA	qRT-PCR
Smu.876R	CAATGAGGGCAGCTAAAAGC	qRT-PCR
Smu.878F	GGAGATGTGCCCGATGTTAT	qRT-PCR
Smu.878R	TTAACGGGACGCTGTAAACC	qRT-PCR
Smu.1185F	TTCCTTCCTAGTCGCTTCCA	qRT-PCR
Smu.1185R	TTCCCATACCAGCATCACAA	qRT-PCR
Smu.1498F	GTATTCACGGTGGGGCTAGA	qRT-PCR
Smu.1498R	CAGTTGTTCCCGGTCCTAAA	qRT-PCR
Smu.1492F	CGACTCTTTTGGGGTTTGAA	qRT-PCR
Smu.1492R	CACCTTGTGCTTCCTTAGCC	qRT-PCR
Smu.1491F	CCGCCAATTAGAAAAGACCA	qRT-PCR
Smu.1491R	AGGCTGCAATGAAAGCAGTT	qRT-PCR
Smu.1568F	TTGAAATGGATTGCCAGTCA	qRT-PCR
Smu.1568R	AACACCGAGGTTGTTTTTGC	qRT-PCR
Smu.1958cF	CTTGTTTGGCAACACATTGG	qRT-PCR
Smu.1958cR	CCATCCATTGGAAGAGCATT	qRT-PCR
Smu.1960cF	GCCTTTGCTGCTAAATCACA	qRT-PCR
Smu.1960cR	GCTTCAATAGCATCCGCTTC	qRT-PCR
mannitol-specific promoterF	CAAATTTTGGCAAAACTTTTGTGCCAAAATTTGAGT	EMSA
mannitol-specific promoterR	TGTACCCGAACCTTCAATGAAGATTTTCGTTCCATC	EMSA
mannose-specific promoterF	CAGGGATATGAAAATGACAAATGACACTGC	EMSA
mannose-specific promoterR	GAATACACCCTACTTTCTTTTTTATTTCAT	EMSA
lactose-specific promoter1F	GTCTGACTCGGACTCTTATTTTTTTGCGTA	EMSA
lactose-specific promoter1R	GTATTATTTAAAAAATATTTCCTTTTTCTG	EMSA
lactose-specific promoter2F	ATGTTTAAAAAATAAACAAAAATGTGTTGA	EMSA
lactose-specific promoter2R	TCATTCTCCTTGAAATGATTTTTTAGTCAG	EMSA
multiple sugar-binding, ABC transporter promoterF	TGCGGAGTTAATGTATGCGGGAT	EMSA
multiple sugar-binding, ABC transporter promoterR	AAGTGTCTCCTTCTACTTTTTAA	EMSA
maltose ABC transporter promoterR	CTTATAAAGTAATTTAATATCTTGATGAAA	EMSA
maltose ABC transporter promoterF	AGCGATTTCCTCCTGAAATTTCTTTGTAAT	EMSA
