# Supplementary material for: A GntR Family Transcription Factor in Streptococcus mutans Regulates Biofilm Formation and Expression of Multiple Sugar Transporter Genes
Source: Front Microbiol. 2019 Jan 14;9:3224. doi: 10.3389/fmicb.2018.03224 (PMC6340165; doi:10.3389/fmicb.2018.03224)
Supplement: TABLE S3 — List of genes downregulated greater than 2.0-fold. [file Table_3.XLSX]

## Sheet: Sheet1
Table S3. List of genes down-regulated greater than 2.0-fold.
Gene No.	NCBI Annotation	p (Corr)	p	fold change (abs)
SMU_11	hypothetical protein	1.12e-07	7.8e-09	2.62079
SMU_29	phosphoribosylaminoimidazolesuccinocarboxamide synthase	2.77e-15	5.49e-17	3.18215
SMU_31	hypothetical protein	1.45e-05	1.72e-06	2.01391
SMU_39	hypothetical protein	1.33e-06	1.24e-07	2.62079
SMU_40	hypothetical protein	6.83e-07	5.55e-08	6.86852
SMU_44	DNA mismatch repair protein	3.99e-08	2.45e-09	2.15846
SMU_45	hypothetical protein	1.47e-11	4.89e-13	2.12874
SMU_46	hypothetical protein	2.94e-08	1.76e-09	2.18859
SMU_47	hypothetical protein	1.07e-13	2.33e-15	2.71321
SMU_99	fructose-bisphosphate aldolase	1.25e-07	8.93e-09	2.04202
SMU_150	hypothetical protein	1.17e-06	1.05e-07	4.02782
SMU_151	hypothetical protein	0.00014	2.25e-05	2.62079
SMU_152	hypothetical protein	0.00058	0.000114	2.14355
SMU_205c	hypothetical protein	0.000123	1.94e-05	2.56685
SMU_206c	hypothetical protein	2.75e-11	9.87e-13	3.43426
SMU_207c	transposon protein	2.41e-10	9.14e-12	2.9897
SMU_208c	transposon protein	4.71e-10	1.89e-11	2.78949
SMU_209c	hypothetical protein	1.32e-07	9.52e-09	2.67586
SMU_210c	hypothetical protein	8.45e-09	4.53e-10	2.82843
SMU_212c	hypothetical protein	2.08e-06	2.06e-07	3.43426
SMU_213c	hypothetical protein	0.0422	0.0177	2.18859
SMU_214c	hypothetical protein	0.000768	0.00016	2.34567
SMU_215c	hypothetical protein	0.00818	0.00258	2.67586
SMU_216c	hypothetical protein	1.28e-06	1.16e-07	3.11666
SMU_219	hypothetical protein	1.36e-20	1.7e-22	3.50642
SMU_363	transcriptional regulator; glutamine synthetase repressor	1.28e-07	9.17e-09	2.23457
SMU_379	hypothetical protein	0.00604	0.00176	2.23457
SMU_411c	hypothetical protein	7.08e-10	2.98e-11	2.05623
SMU_423	hypothetical protein	0.000116	1.82e-05	2.12874
SMU_424	negative transcriptional regulator, CopY	7.08e-10	3.02e-11	2.71321
SMU_438c	(R)-2-hydroxyglutaryl-CoA dehydratase activator-like protein	5.37e-44	3.36e-46	5.73582
SMU_496	cysteine synthetase A	1.66e-21	1.82e-23	3.75809
SMU_500	ribosome-associated protein	9.05e-12	2.92e-13	2.42839
SMU_503c	hypothetical protein	3.36e-13	8.44e-15	3.41054
SMU_510c	hypothetical protein	1.07e-25	1.01e-27	3.73213
SMU_609	40K cell wall protein	2.56e-55	1.47e-57	5.89708
SMU_616	hypothetical protein	5.77e-19	9.31e-21	3.43426
SMU_618	hypothetical protein	4.93e-23	5.13e-25	3.36359
SMU_620	hypothetical protein	0.000219	3.74e-05	2
SMU_840c	hypothetical protein	3.36e-13	8.58e-15	2.62079
SMU_856	bifunctional pyrimidine regulatory protein PyrR/uracil phosphoribosyltransferase	2.26e-06	2.26e-07	3.41054
SMU_857	uracil permease	8.36e-06	9.44e-07	2.53151
SMU_876	MSM operon regulatory protein	9.57e-08	6.45e-09	2.17347
SMU_877	alpha-galactosidase	1.13e-10	4.24e-12	2.60268
SMU_878	multiple sugar-binding ABC transporter, sugar-binding protein MsmE	5.56e-10	2.29e-11	2.78949
SMU_879	multiple sugar-binding ABC transporter permease MsmF	3.62e-05	4.77e-06	2.20381
SMU_880	multiple sugar-binding ABC transporter permease MsmG	5.46e-05	7.53e-06	2.36199
SMU_881	sucrose phosphorylase GtfA	3e-07	2.26e-08	2.60268
SMU_882	multiple sugar-binding ABC transporter ATP-binding protein, MsmK	8.98e-06	1.03e-06	2.18859
SMU_883	dextran glucosidase DexB	2.63e-07	1.95e-08	2.26577
SMU_886	galactokinase	4.73e-06	5e-07	2.44528
SMU_932	hypothetical protein	2.85e-20	4e-22	5.42642
SMU_933	amino acid ABC transporter substrate-binding protein	2.77e-16	5.34e-18	5.06303
SMU_934	amino acid ABC transporter permease	4.25e-12	1.26e-13	4.62675
SMU_935	amino acid ABC transporter permease	2.11e-16	3.96e-18	4.95883
SMU_936	amino acid ABC transporter ATP-binding protein	9.78e-19	1.63e-20	4.89056
SMU_961	hypothetical protein	4.85e-08	3.01e-09	2.26577
SMU_1072c	acetyltransferase	8.13e-06	9.14e-07	2.49666
SMU_1073	formate--tetrahydrofolate ligase	2.54e-05	3.22e-06	2.17347
SMU_1159c	hypothetical protein	0.00807	0.00253	2.12874
SMU_1185	PTS system mannitol-specific transporter subunit IIBC	0.000263	4.59e-05	2.78949
SMU_1192	DNA polymerase III DnaE	2.79e-10	1.07e-11	2.01391
SMU_1193	transcriptional regulator	1.84e-121	3.82e-124	1341.84
SMU_1203	branched-chain amino acid aminotransferase	4.96e-41	3.36e-43	4.22807
SMU_1223	dihydroorotate dehydrogenase 1B	3.46e-05	4.54e-06	2.2974
SMU_1224	dihydroorotate dehydrogenase electron transfer subunit	3.06e-05	3.99e-06	2.82843
SMU_1330c	transposase	0.0272	0.0105	3.18215
SMU_1354c	transposase fragment	6.34e-11	2.34e-12	2.67586
SMU_1355c	transposase fregment	3.35e-10	1.33e-11	2.44528
SMU_1357	transposase fragment	1.65e-19	2.58e-21	3.94493
SMU_1358	transposase fragment	9.92e-08	6.87e-09	4.50023
SMU_1360c	hypothetical protein	2.75e-11	9.76e-13	3.65533
SMU_1361c	TetR family transcriptional regulator	5.72e-27	5.06e-29	3.01049
SMU_1363c	transposase	1.67e-144	8.69e-148	37.014
SMU_1397c	hypothetical protein	6.49e-05	9.22e-06	2.2974
SMU_1456c	hypothetical protein	0.0396	0.0165	2.31338
SMU_1488c	hypothetical protein	7.62e-13	2.06e-14	6.86852
SMU_1489	hypothetical protein	9.14e-15	1.86e-16	4.65893
SMU_1490	6-phospho-beta-galactosidase	1.19e-17	2.11e-19	7.78124
SMU_1491	PTS system lactose-specific transporter subunit IIBC	2.87e-13	6.87e-15	7.4127
SMU_1492	PTS system lactose-specific transporter subunit IIA	4.12e-11	1.5e-12	10.6295
SMU_1493	tagatose 1,6-diphosphate aldolase	5.72e-12	1.76e-13	8.81524
SMU_1494	tagatose-6-phosphate kinase	7.64e-14	1.59e-15	10.0561
SMU_1495	galactose-6-phosphate isomerase subunit LacB	5.5e-18	9.45e-20	10.7034
SMU_1496	galactose-6-phosphate isomerase subunit LacA	3.2e-13	7.84e-15	8.63383
SMU_1498	lactose repressor	7.43e-06	8.27e-07	2.02792
SMU_1527	ATP synthase F0F1 subunit epsilon	1.05e-09	4.58e-11	2.01391
SMU_1528	ATP synthase F0F1 subunit beta	2.93e-09	1.39e-10	2.04202
SMU_1529	ATP synthase F0F1 subunit gamma	7.22e-08	4.7e-09	2.14355
SMU_1530	ATP synthase F0F1 subunit alpha	3.28e-08	2e-09	2.11404
SMU_1531	ATP synthase F0F1 subunit delta	1.68e-09	7.53e-11	2.34567
SMU_1532	ATP synthase F0F1 subunit B	6.78e-09	3.42e-10	2.2974
SMU_1533	ATP synthase F0F1 subunit A	1.15e-07	8.06e-09	2.08493
SMU_1534	ATP synthase F0F1 subunit C	9.72e-08	6.63e-09	2.28153
SMU_1568	maltose ABC transporter substrate-binding protein	7.62e-12	2.38e-13	2.53151
SMU_1574c	hypothetical protein	4.52e-12	1.36e-13	2.04202
SMU_1575c	hypothetical protein	3.9e-12	1.14e-13	3.68075
SMU_1576c	hypothetical protein	1.97e-21	2.25e-23	2.80889
SMU_1577c	hypothetical protein	1.23e-08	6.86e-10	2.04202
SMU_1701c	hypothetical protein	7.42e-08	4.87e-09	2.02792
SMU_1725	acylphosphatase	2.41e-05	3.02e-06	2.36199
SMU_1750c	hypothetical protein	1.19e-06	1.07e-07	3.13834
SMU_1752c	hypothetical protein	1.06e-08	5.78e-10	2.34567
SMU_1753c	hypothetical protein	9.57e-08	6.47e-09	2.11404
SMU_1804c	hypothetical protein	7.75e-09	4.03e-10	2.78949
SMU_1813	transposase fragment	0.0233	0.00873	2.41162
SMU_1906c	hypothetical protein	0.000139	2.22e-05	2.49666
SMU_1907	hypothetical protein	0.00758	0.00233	2.80889
SMU_1908c	hypothetical protein	3.06e-05	3.97e-06	2.47942
SMU_1909c	hypothetical protein	0.000381	7e-05	2.12874
SMU_1910c	hypothetical protein	0.000538	0.000104	2.05623
SMU_1912c	hypothetical protein	0.0104	0.00337	2.20381
SMU_1914c	hypothetical protein	0.000206	3.49e-05	2.20381
SMU_1941	membrane lipoprotein	1.82e-13	4.16e-15	2.36199
SMU_1942c	amino acid binding protein	1.63e-20	2.13e-22	3.5801
SMU_1955	co-chaperonin GroES	1.7e-06	1.66e-07	2.15846
SMU_1956c	hypothetical protein	1.97e-16	3.59e-18	5.38893
SMU_1957	PTS system mannose-specific transporter subunit IID	9.26e-20	1.35e-21	5.06303
SMU_1958c	PTS system mannose-specific transporter subunit IIC	2.34e-20	3.17e-22	5.24157
SMU_1960c	PTS system mannose-specific transporter subunit IIB	2.65e-28	2.07e-30	6.19026
SMU_1961c	PTS system sugar-specific transporter subunit IIA	4.91e-28	4.09e-30	6.72717
SMU_2027	transcriptional regulator	3.98e-13	1.04e-14	3.03143
SMU_2073c	hypothetical protein	0.00617	0.0018	4.46915
SMU_2133c	hypothetical protein	0.000634	0.000129	2.01391
SMU_2164	serine protease HtrA	1.49e-12	4.18e-14	2.18859
